# Supplementary material
Source: MDPI journal article supplement (https://www.mdpi.com/2413-8851/2/4/97)
Supplement: s1 [file s1]

Archive with 2 entries (2 files):
- Supplementary Material/Supplementary material. List S1 - List of relevant survey questions used in the EG online survey.pdf
- Supplementary Material/Supplementary Material. List S2 - List of REP items used in the EG project online survey..pdf
