# Supplementary material
Source: MDPI journal article supplement (https://www.mdpi.com/2413-8851/2/4/97)
Supplement: s1 [file s1]

# Supplementary Material: Online Survey Questions from the “Edible Gardens” Project

## Category #1: Background, motivations & learning sources

1. Do you grow food at home, at a community garden, or at a school? (Please select the main place you grow food. If you grow food at more than one place you can complete the survey again)

☐ At home

☐ At a community garden

☐ At a school

2. How long have you been growing food?

☐ Less than 1 year

☐ 1 - 5 years

☐ 6 - 10 years

☐ 11+ years

3. How would you describe your gardening consistency:

☐ On and off again

☐ Seasonal e.g. every summer

☐ All through the year.

☐ Other (please describe):

4. Why did you start growing some of your own food?

5. What are the top three reasons you now grow some of your own food?

1.

2.

3.

6. From where have you learnt about or received food gardening knowledge from? Please check all that apply.

☐ Family

☐ Friends

☐ Books

☐ Online

☐ From attending classes or courses

☐ From other home gardeners

☐ From other community gardeners

☐ Trial and error

☐ Other (please describe):

## Category #2: Food preservation

7. To what extent to you agree with this statement? Please select one of the following:

“I experience gluts of crops (a lot of one crop) when growing food”.

☐ Strongly disagree

☐ Disagree

☐ Neutral

☐ Agree

☐ Strongly agree

8. Please select all the food processing, storing, or preserving techniques you used within the last 12 months:

- ☐ Storing produce
- ☐ Drying or de-hydrating produce
- ☐ Freezing produce
- ☐ Canning
- ☐ Making jams or preserves or sauces
- ☐ Pickling or fermenting produce
- ☐ Other (please describe):

9. If you don't process, store or preserve food, is there any particular reason why not?

10. If you do process, store or preserve food, why do you?

### Category #3: Food distribution

11. Do you gift, share or donate food you grow to others outside your household?

☐ Yes

☐ No

12. If "yes", how often do you share, gift or donate food to others?

- ☐ Once or twice a year
- ☐ Every couple of months
- ☐ Every couple of weeks
- ☐ Every time I harvest something

13. If you don't gift, share or donate food to others outside of your household, is there any particular reason why not?

14. If "yes", who have you given food to? Please check all that apply:

- ☐ Family
- ☐ Friends
- ☐ Neighbours
- ☐ Strangers
- ☐ Work
- ☐ Swap meet
- ☐ Charities, for example, Oz Harvest
- ☐ Other (please describe):

15. If "yes", do you purposefully grow extra food to give, share or donate to others?

☐ Yes

☐ No

### Category #4: Social Capital

16. Please rate the following statements out of five, where 1 = Strongly Disagree; 2 = Disagree; 3 = Neutral; 4 = Agree and 5 = Strongly Agree:

“People around this neighbourhood are willing to help their neighbours.”  
“This is a close-knit, or “tight” neighbourhood where people generally know one another.”  
“If I had to borrow \$30 in an emergency, I could borrow it from a neighbour.”  
“People in this neighbourhood generally get along with each other.”  
“People in this neighbourhood can be trusted.”  
“If I were sick, I could count on my neighbours to shop for groceries for me.”  
“People in this neighbourhood share the same values.”

17. How long have you lived in your house/home?

[Blank line]

18. How long have you lived in your neighbourhood?

[Blank line]

19. Have you ever organised or participated in group gardening activities? For example, working bees, garden tours, or harvest parties.

[Checkbox] Yes, I have organised events.

[Checkbox] Yes, I have participated in these types of activities.

[Checkbox] No, I have not organised or participated in these types of activities.

20. If you answered 'yes' to the above question, what kind of activities have you organised or participated in?

[Blank line]

#### Category #5: Demographics

21. How old are you?

[Checkbox] 18 – 20

[Checkbox] 21 – 30

[Checkbox] 31 – 40

[Checkbox] 41 – 50

[Checkbox] 51 – 60

[Checkbox] 61 – 70

[Checkbox] 71 – 80

[Checkbox] 81+

22. Please select your gender.

[Checkbox] Male

[Checkbox] Female

[Checkbox] Indeterminate/Intersex/Unspecified

23. Are you currently renting or do you own your own home?

[Checkbox] Renting

[Checkbox] Own my own home / have a mortgage

[Checkbox] Other situation (please describe): [Blank line]

24. How many people are there in your household?

[Blank line]

25. How many of your household are of primary school age or younger?

[Blank line]

26. How many of your household are over 65 years of age?

[Blank line]

27. What is the highest level of education have you completed?

☐ School (Year 10)

☐ School (Year 11)

☐ School (Year 12)

☐ Diploma/Certificate

☐ Bachelor degree

☐ Postgraduate Degree

☐ Other (please specify)

28. What is the postcode of the suburb you live in?
