# Supplementary material
Source: MDPI journal article supplement (https://www.mdpi.com/2413-8851/2/4/97)
Supplement: s1 [file s1]

## Supplementary Material: List of REP-style scale items from the “Edible Gardens” Project

### Category #6: Recreation Experience Preference-Style Scale Values

The following statements are about things that motivate you to grow and maintain a food garden. Please rate each statement according to how true it is for you, where 1 = Strongly Disagree; 2 = Disagree; 3 = Neutral; 4 = Agree and 5 = Strongly Agree.

When answering these questions please take into account any food production in your gardens (e.g. vegetables, fruits, herbs, chickens, fish or bees etc.)

1. I produce food to save money
2. I produce food to have fresh produce
3. I produce food to have produce that is healthy for me
4. I produce food to have tastier food
5. I produce food because I enjoy it
6. I produce food to keep physically fit
7. I produce food to relax physically
8. I produce food to feel a sense of pride
9. I produce food to prove to myself and others that I can produce my own food
10. I produce food to feel independent
11. I produce food to spend time with family
12. I produce food to be with other food producers
13. I produce food to meet new and varied people
14. I produce food to develop my skills
15. I produce food to learn new things
16. I produce food to enjoy the sounds and smells of nature
17. I produce food to be close to nature
18. I produce food to be creative
19. I produce food to remind me about the good times I've had in the past
20. I produce food to help release tension
21. When I garden, my mind moves at a slower pace
22. I produce food to get away from the usual demands of life
23. I produce food to experience tranquillity
24. I produce food to be alone
25. I produce food to be near considerate people
26. I produce food to be away from the family for a while
27. I produce food so I can share what I have learned with others
28. Food production is an important part of who I am
29. I use food production as a time to reflect
30. I produce food to grow and develop spiritually
